# Supplementary material for: An artificial photosynthetic model based on a molecular triad of boron dipyrromethene and phthalocyanine
Source: Royal Society of Chemistry journal article supplement (doi:10.1039/c6cp00920d), 2016-01-01
Supplement: c6cp00920d1.pdf [file c6cp00920d1.pdf]

## Electronic Supplementary Information

### An artificial photosynthetic model based on a molecular triad of boron dipyrromethene and phthalocyanine

Eugeny A. Ermilov,\* Jian-Yong Liu, Roel Menting, Ying-Si Huang, Beate Röder and

Dennis K. P. Ng\*

#### Contents

**Fig. S1** UV-Vis absorption spectra of triad **4** in CHCl<sub>3</sub>, THF and DMF.

**Fig. S2** Transient absorption spectra of **4** in toluene (A), CHCl<sub>3</sub> (B) and DMF (C) upon BDP-, MSBDP- and SiPc-part excitation. Spectra are normalised at the negative SiPc ground state bleaching signal and recorded directly after excitation.

**Fig. S3** Transient absorption spectra of SiPc(BDP)<sub>2</sub> and triad **4** in DMF upon SiPc-part excitation.

**Table S1** Electrochemical data for the triad **4** and the reference compounds **1**, **2** and **3**.

<sup>1</sup>H NMR spectra of MSBDP **2** and triad **4** in CDCl<sub>3</sub>

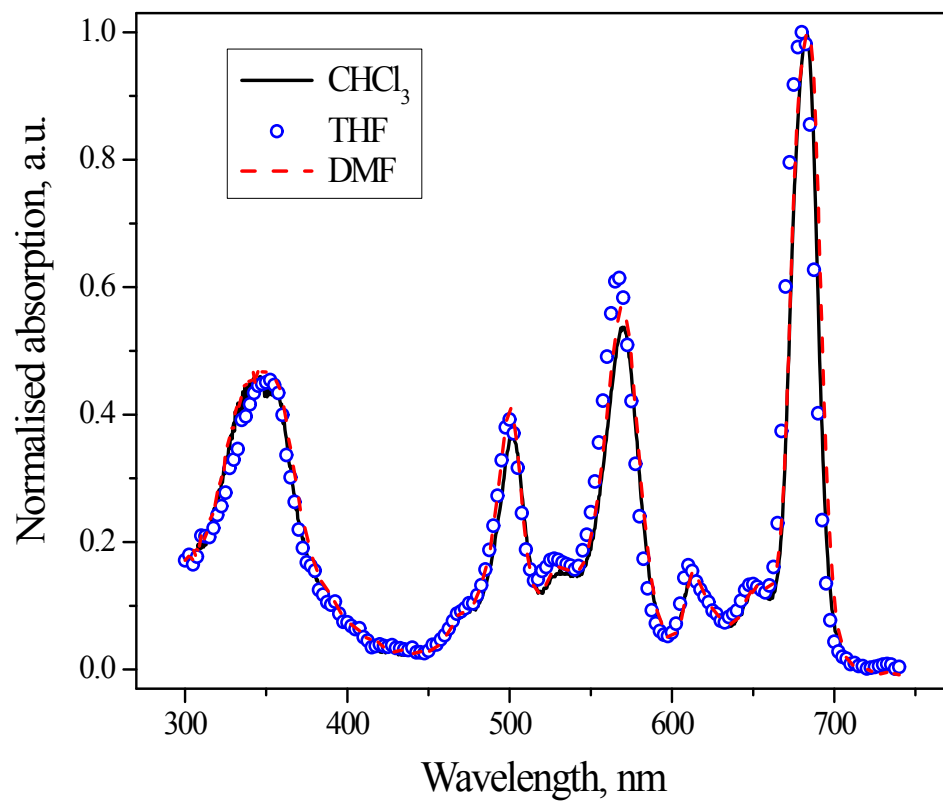

**Fig. S1** UV-Vis absorption spectra of triad 4 in CHCl<sub>3</sub>, THF and DMF

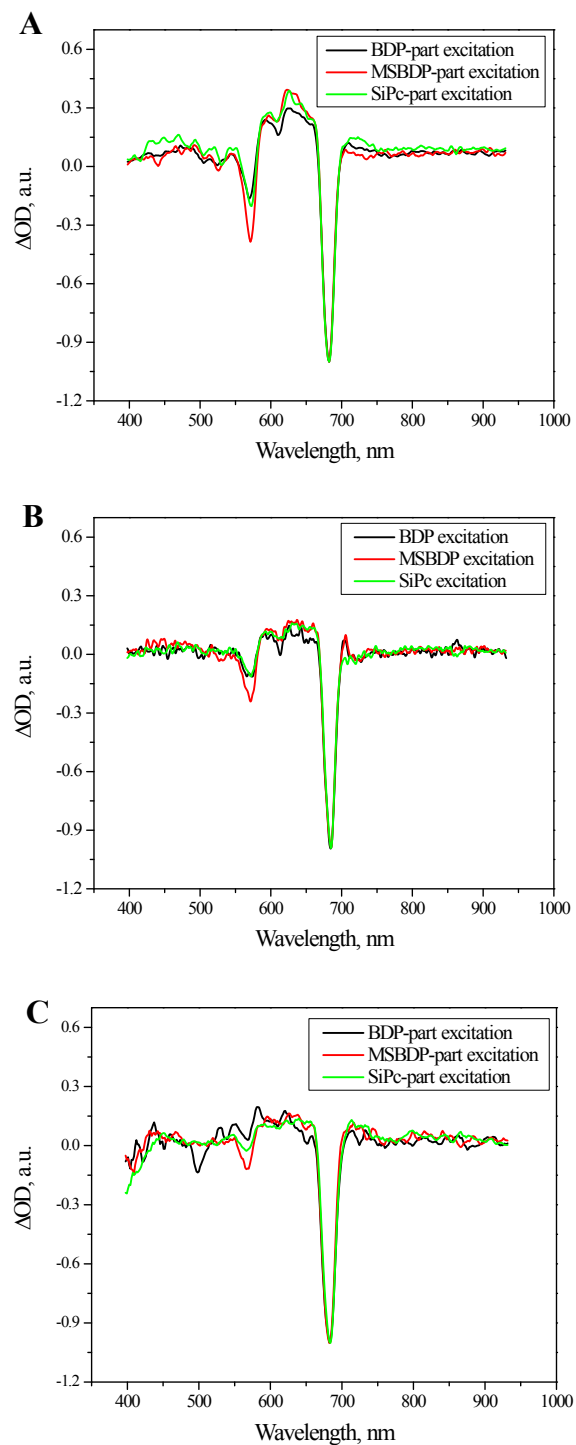

**Fig. S2** Transient absorption spectra of **4** in toluene (A),  $\text{CHCl}_3$  (B) and DMF (C) upon BDP-, MSBDP- and SiPc-part excitation. Spectra are normalised at the negative SiPc ground state bleaching signal and recorded directly after excitation.

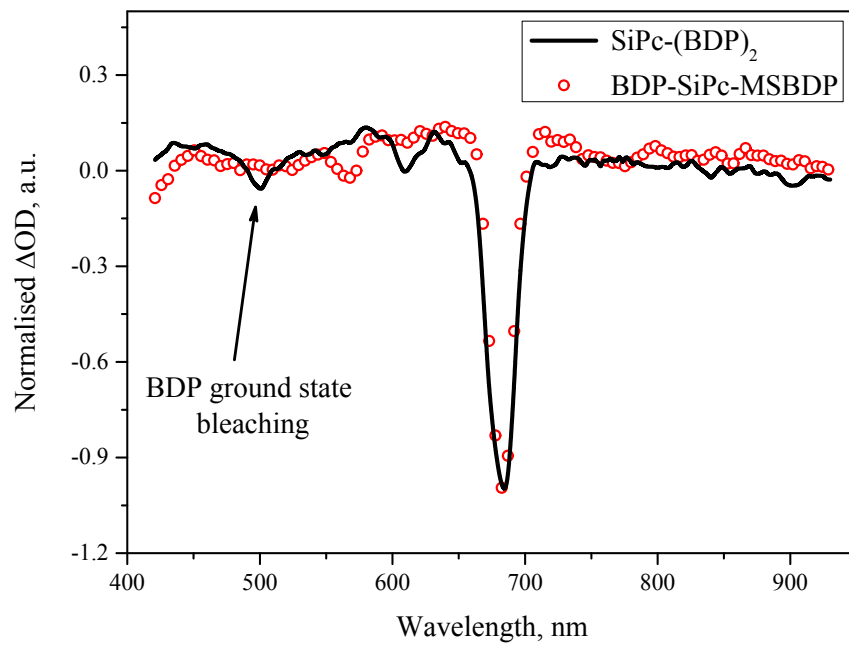

**Fig. S3** Transient absorption spectra of SiPc(BDP)<sub>2</sub> and triad **4** in DMF upon SiPc-part excitation.

**Table S1** Electrochemical data for the triad **4** and the reference compounds **1**, **2** and **3**.<sup>a</sup>

| Compound | $E_{\text{red}} / \text{V}$ | $E_{\text{ox}} / \text{V}$ |
|----------|-----------------------------|----------------------------|
| <b>4</b> | -0.56, -1.11, -1.40         | 0.87, 1.12                 |
| <b>1</b> | -1.21                       | 1.05                       |
| <b>2</b> | -1.12                       | 0.92                       |
| <b>3</b> | -0.57, -1.11                | 1.13                       |

<sup>a</sup> Recorded with  $[\text{Bu}_4\text{N}][\text{PF}_6]$  as electrolyte in DMF (0.1 M) at ambient temperature with a scan rate of  $100 \text{ mV s}^{-1}$ . Potentials were referenced to SCE using ferrocene as an internal standard ( $E_{1/2} = +0.38 \text{ V vs. SCE}$ ).

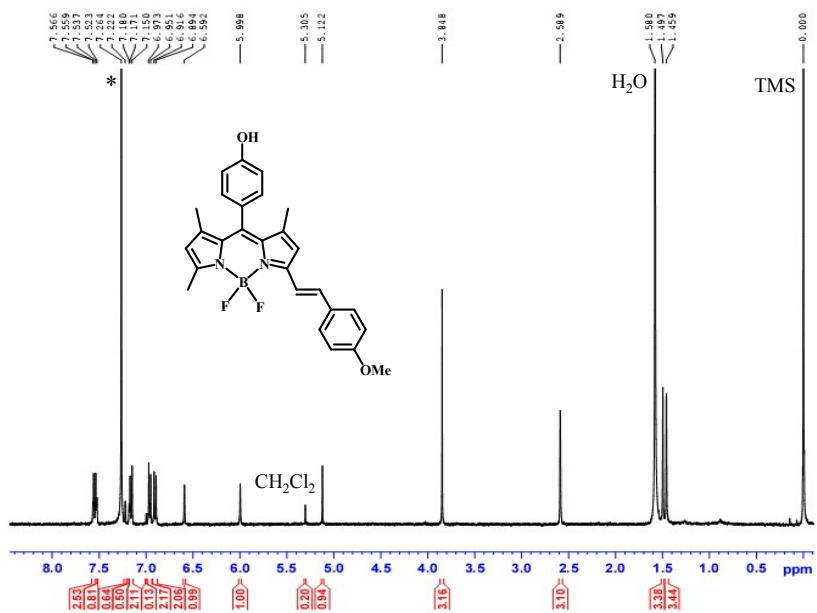

<sup>1</sup>H NMR spectrum of MSBDP 2 in CDCl<sub>3</sub>

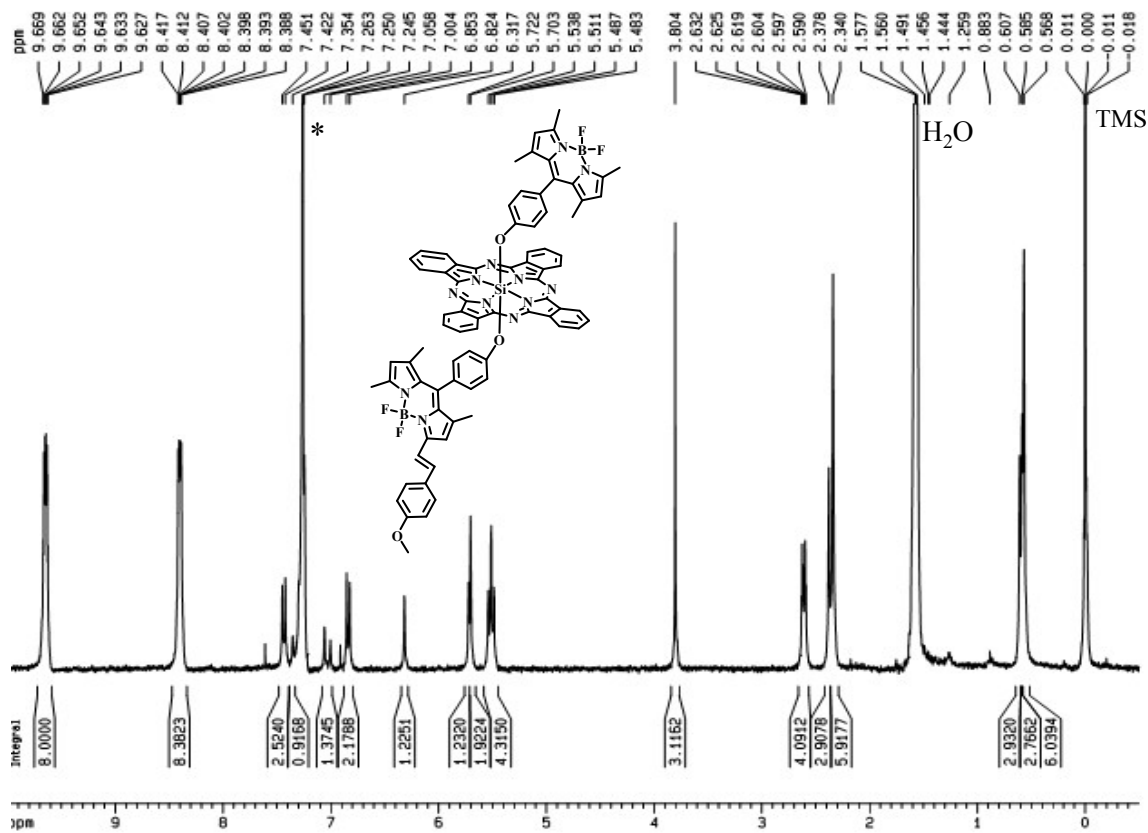

<sup>1</sup>H NMR spectrum of triad 4 in CDCl<sub>3</sub>
